# Supplementary material for: cis-1 Isomers of tethered bismethano[70]fullerene as electron acceptors in organic photovoltaics
Source: Royal Society of Chemistry journal article supplement (doi:10.1039/c8ra02896f), 2018-01-01
Supplement: c8ra02896f1.pdf [file c8ra02896f1.pdf]

Supplementary Information for

*cis*-1 Isomers of tethered bismethano [70]fullerene  
as electron acceptors in organic photovoltaics

Tomokazu Umeyama,<sup>a,\*</sup> Shogo Takahara,<sup>a</sup> Sho Shibata,<sup>a</sup> Kensho Igarashi,<sup>a</sup>

Tomohiro Higashino,<sup>a</sup> Kenji Mishima,<sup>b</sup> Koichi Yamashita,<sup>b</sup> and Hiroshi Imahori<sup>a,c,\*</sup>

<sup>a</sup>Department of Molecular Engineering, Graduate School of Engineering, Kyoto University,  
Nishikyo-ku, Kyoto 615-8510, Japan

<sup>b</sup>Department of Chemical System Engineering School of Engineering, The University of  
Tokyo 7-3-1, Hongo, Bunkyo-ku, Tokyo 113-8656, Japan

<sup>c</sup>Institute for Integrated Cell-Material Sciences (WPI-iCeMS), Kyoto University, Sakyo-ku,  
Kyoto 606-8501, Japan

*e-mail: umeyama@scl.kyoto-u.ac.jp, imahori@scl.kyoto-u.ac.jp*

*Fax: +81-75-383-2571; Tel: +81-75-383-2568, +81-75-383-2566*

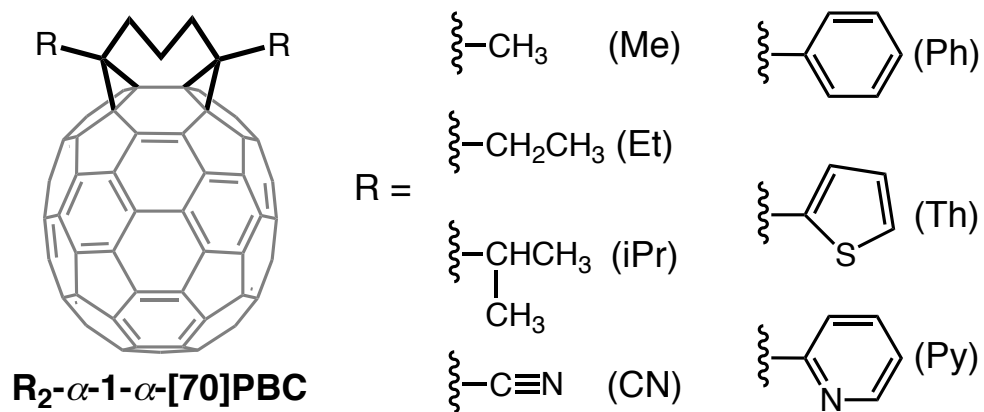

**Fig. S1** Structures of  $R_2\text{-}\alpha\text{-1-}\alpha\text{-[70]PBC}$  ( $R = \text{Me, Et, iPr, CN, Ph, Th, Py}$ ).

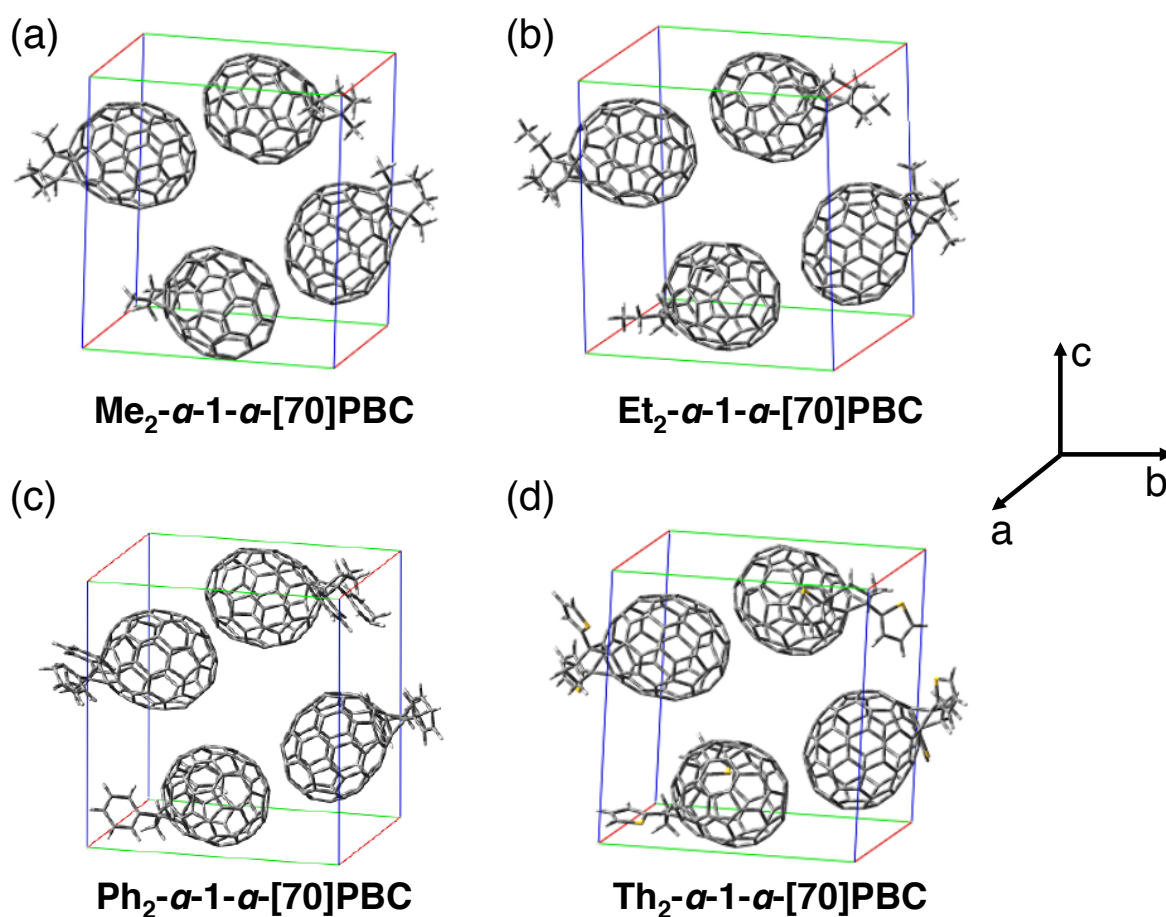

**Fig. S2** Representative examples for the structures of R<sub>2</sub>- $\alpha$ -1- $\alpha$ -[70]PBC solid systems optimized under periodic boundary conditions at PM6-D3 based on MOPAC. (a) Me<sub>2</sub>- $\alpha$ -1- $\alpha$ -[70]PBC, (b) Et<sub>2</sub>- $\alpha$ -1- $\alpha$ -[70]PBC, (c) Ph<sub>2</sub>- $\alpha$ -1- $\alpha$ -[70]PBC, and (d) Th<sub>2</sub>- $\alpha$ -1- $\alpha$ -[70]PBC.

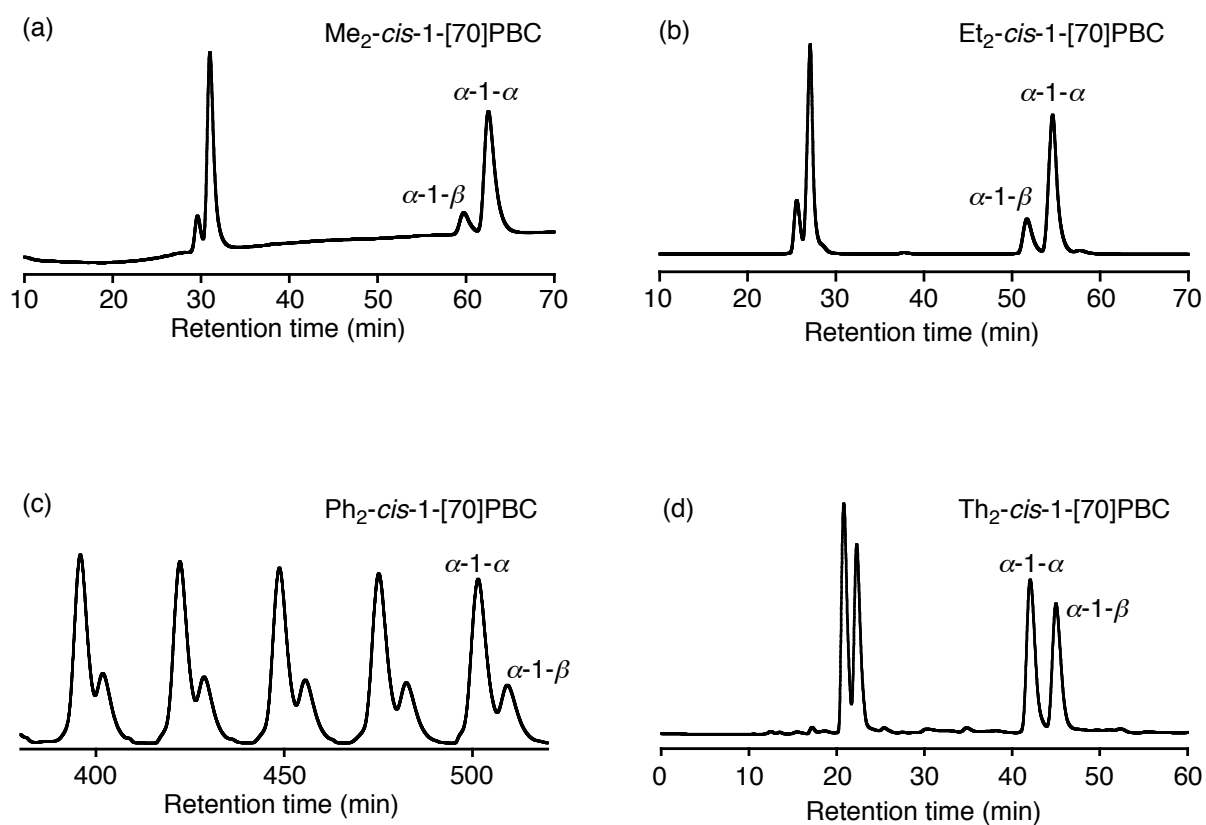

**Fig. S3** HPLC profiles with Buckyprep column of (a)  $\text{Me}_2\text{-cis-1-[70]PBC}$ , (b)  $\text{Et}_2\text{-cis-1-[70]PBC}$ , (c)  $\text{Ph}_2\text{-cis-1-[70]PBC}$ , and (d)  $\text{Th}_2\text{-cis-1-[70]PBC}$ .

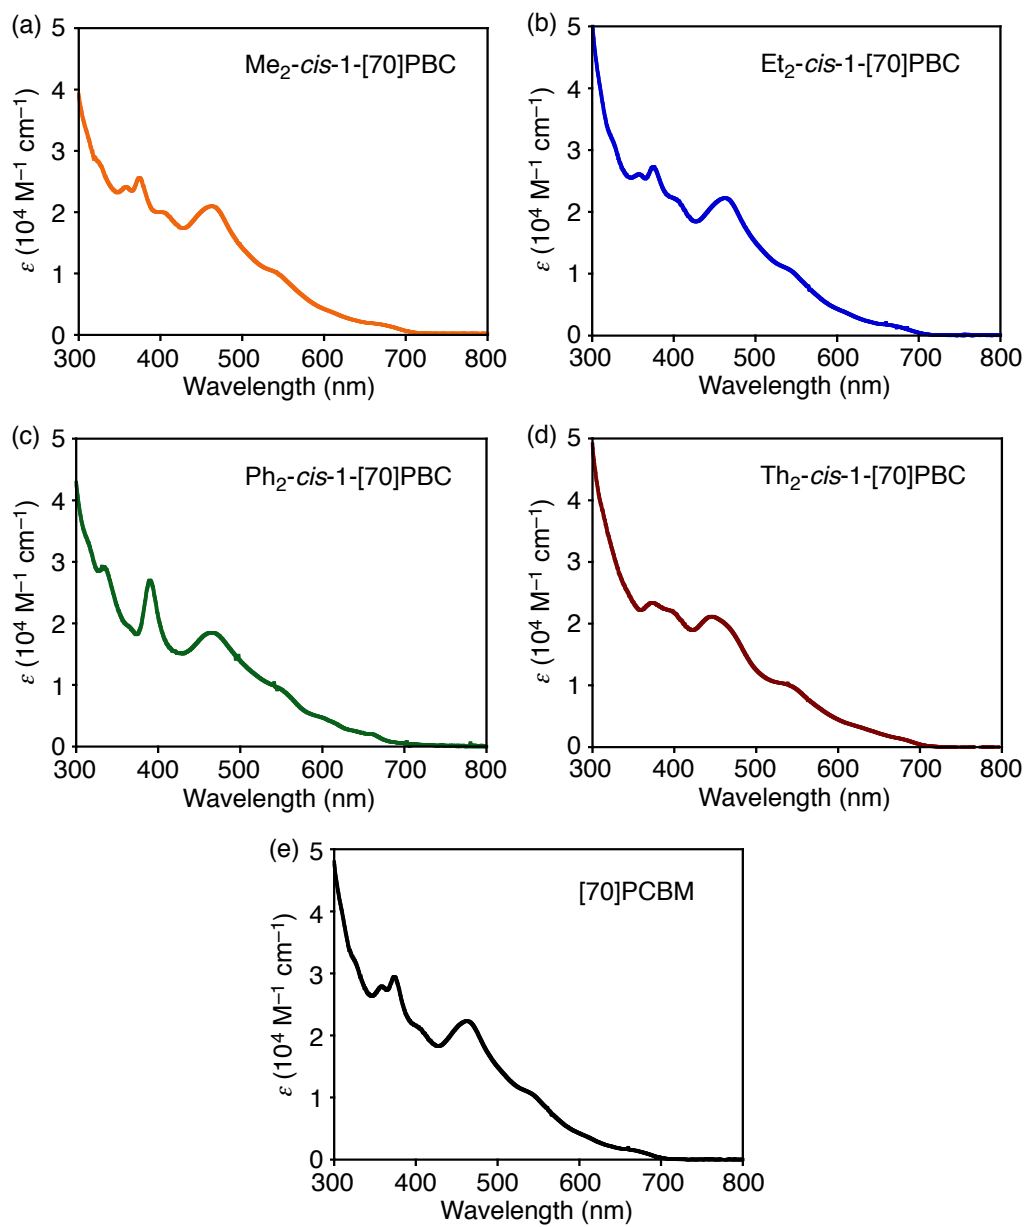

**Fig. S4** UV-vis absorption spectra of (a)  $\text{Me}_2\text{-cis-1-[70]PBCB}$ , (b)  $\text{Et}_2\text{-cis-1-[70]PBCB}$ , (c)  $\text{Ph}_2\text{-cis-1-[70]PBCB}$ , (d)  $\text{Th}_2\text{-cis-1-[70]PBCB}$ , and (e)  $\text{[70]PCBM}$  in ODCB.

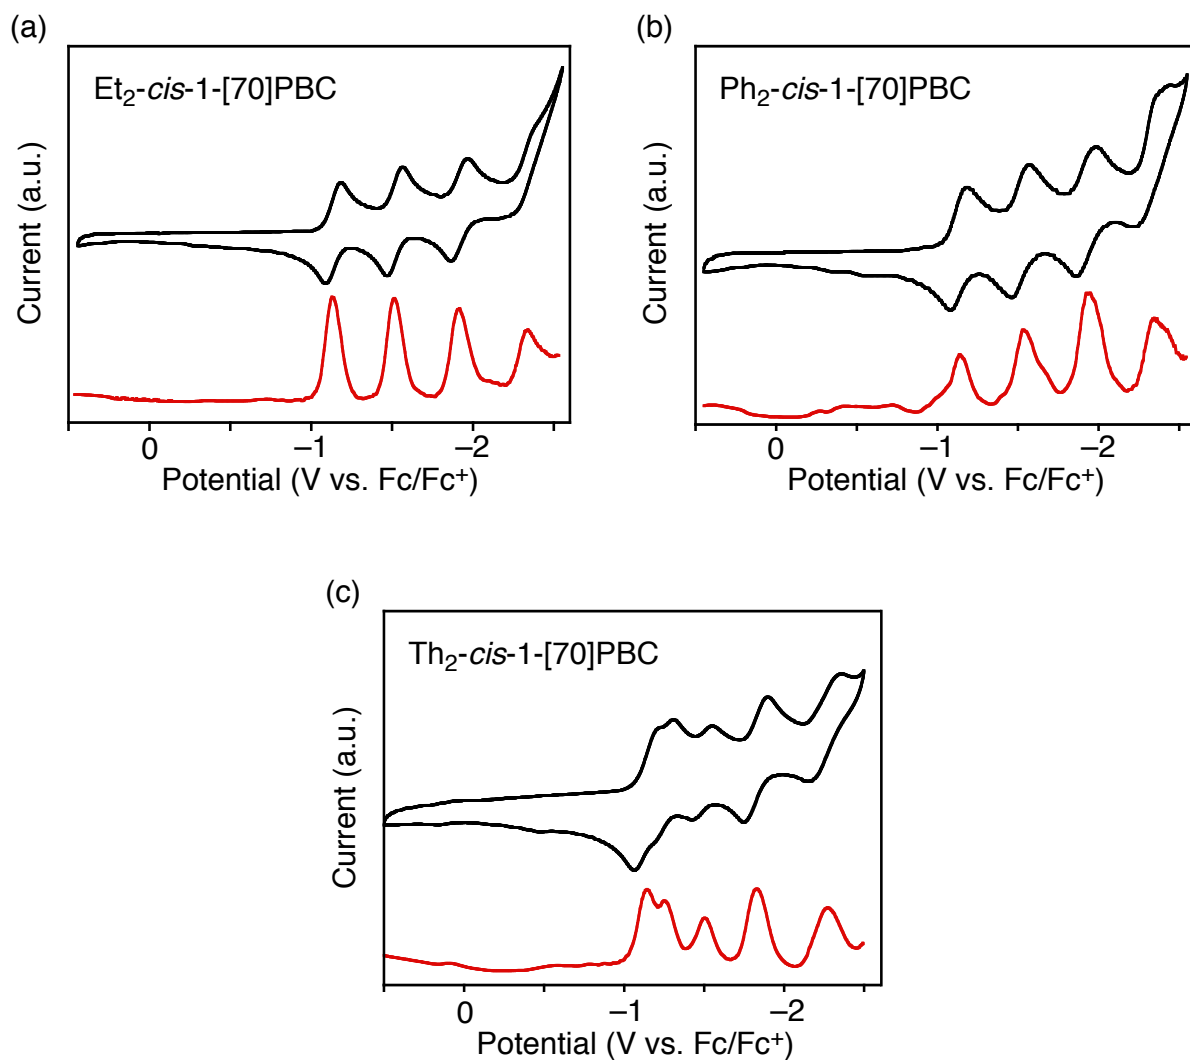

**Fig. S5** Cyclic voltammograms (upper) and differential pulse voltammograms (lower) of (a) Et<sub>2</sub>-cis-1-[70]PBC, (b) Ph<sub>2</sub>-cis-1-[70]PBC, and (c) Th<sub>2</sub>-cis-1-[70]PBC versus a reference electrode of Fc/Fc<sup>+</sup> measured in ODCB/acetonitrile mixture (v/v = 5:1) containing 0.1 M tetrabutylammonium hexafluorophosphate (Bu<sub>4</sub>NPF<sub>6</sub>). Sweep rate: 0.1 V s<sup>-1</sup>; reference electrode, Ag/Ag<sup>+</sup> (0.01 M AgNO<sub>3</sub>, 0.09 M Bu<sub>4</sub>NPF<sub>6</sub> in acetonitrile).

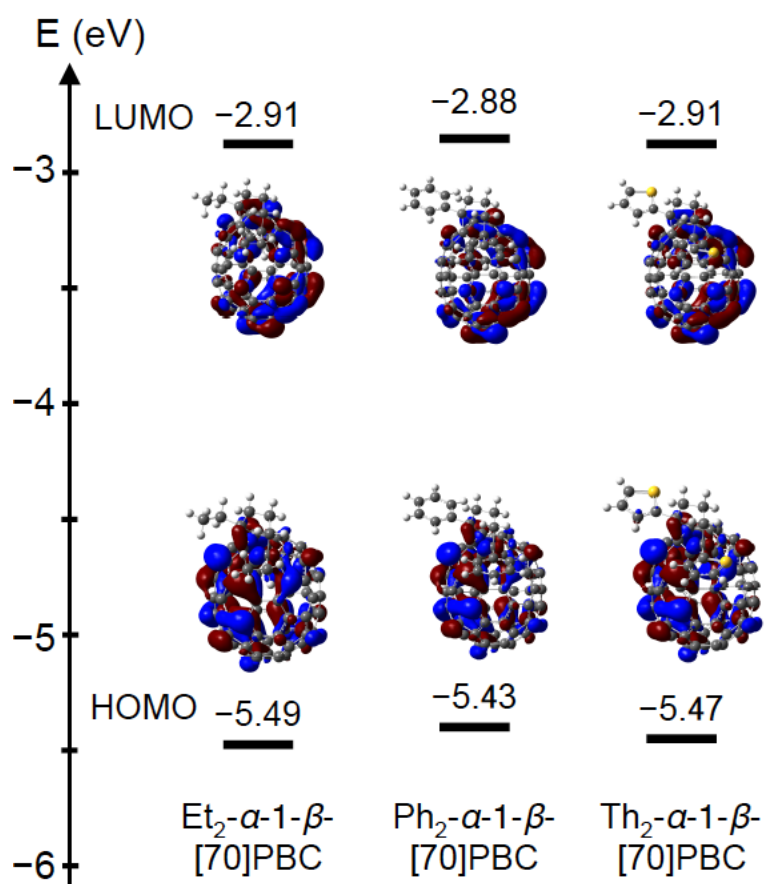

**Fig. S6** Optimized geometries, HOMO/LUMO electron density distributions, and energy levels of Et<sub>2</sub>-α-1-β-[70]PBC, Ph<sub>2</sub>-α-1-β-[70]PBC, and Th<sub>2</sub>-α-1-β-[70]PBC by DFT calculations using RB3LYP/6-31G(d) model.

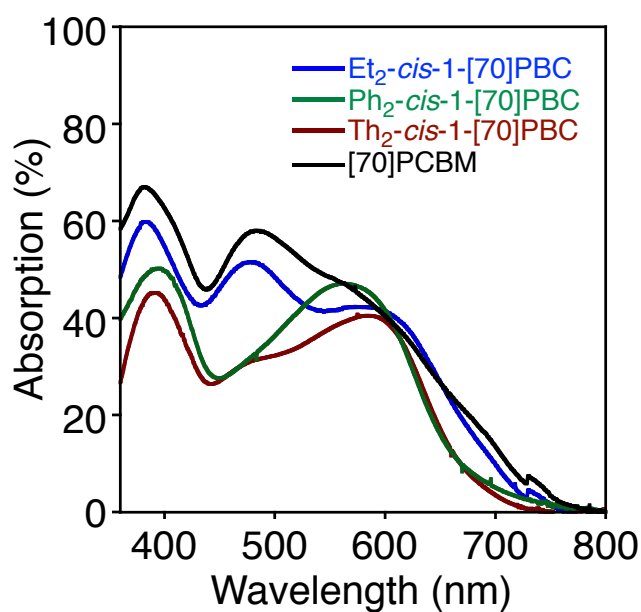

**Fig. S7** UV-visible absorption spectra of blend films of PCDTBT:Et<sub>2</sub>-cis-1-[70]PBC (blue), PCDTBT:Ph<sub>2</sub>-cis-1-[70]PBC (green), PCDTBT:Th<sub>2</sub>-cis-1-[70]PBC (brown), and PCDTBT:[70]PCBM (black) on ITO/PEDOT:PSS substrates. Note here that the total absorptions of the ITO/PEDOT:PSS/PCDTBT:fullerene/TiO<sub>x</sub>/Al devices are higher than the values in this figure due to the reflection from the Al electrode through the optical spacer, TiO<sub>x</sub>.



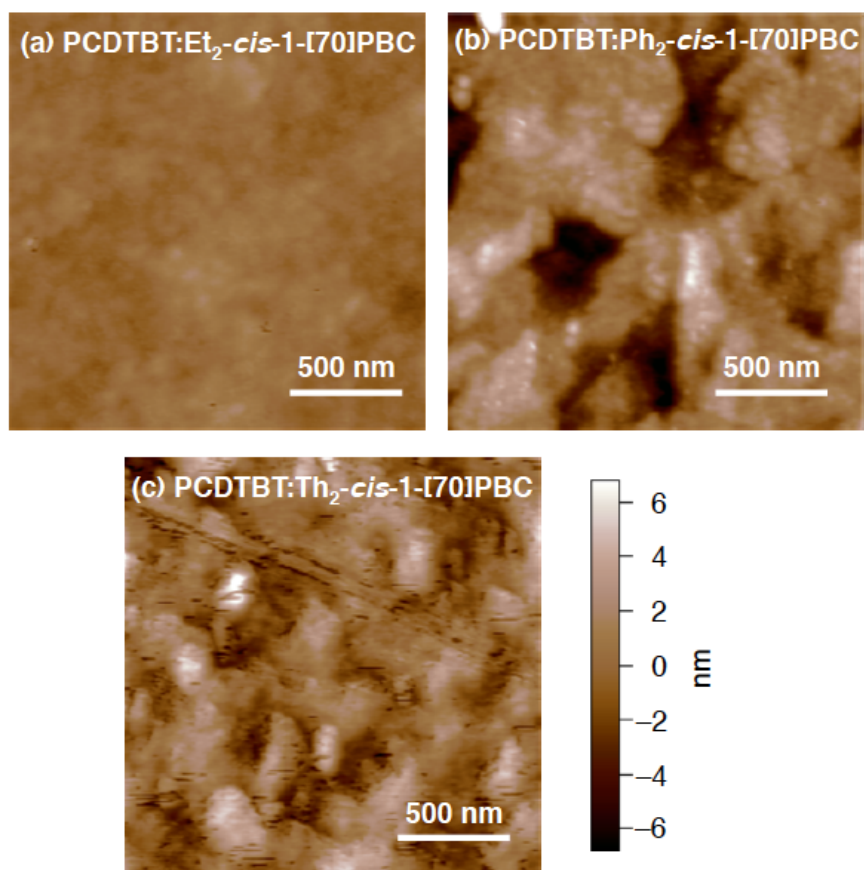

**Fig. S8** Tapping-mode atomic force micrographs of ((a) PCDTBT:Et<sub>2</sub>-*cis*-1-[70]PBC, (b) PCDTBT:Ph<sub>2</sub>-*cis*-1-[70]PBC, and (c) PCDTBT:Th<sub>2</sub>-*cis*-1-[70]PBC on ITO/PEDOT:PSS substrates. The color scale represents the height topography, with bright and dark representing the highest and lowest features, respectively. The rms surface roughnesses are (a) 0.59, (b) 2.3, and (c) 1.9 nm, respectively.

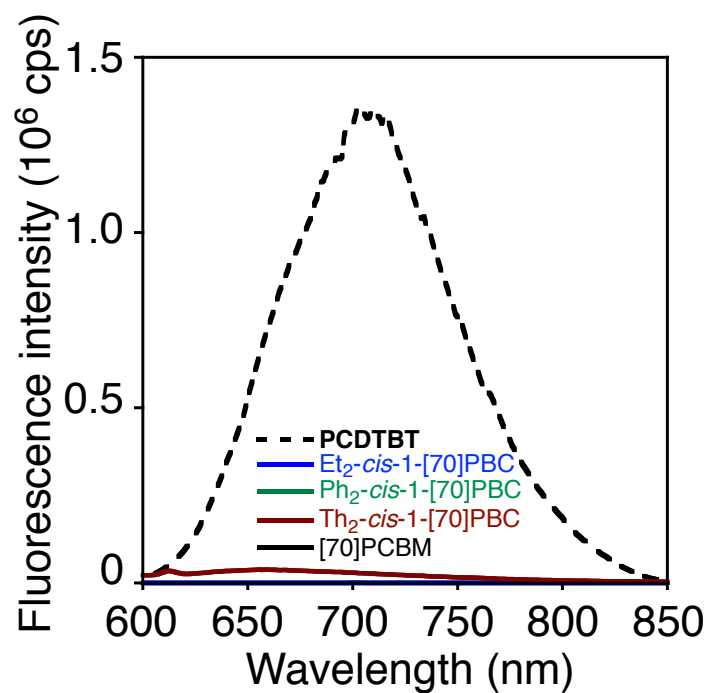

**Fig. S9** Photoluminescence spectra of PCDTBT single component film (black dotted line) and blend films of PCDTBT with Et<sub>2</sub>-cis-1-[70]PBC (blue solid line), Ph<sub>2</sub>-cis-1-[70]PBC (green solid line), Th<sub>2</sub>-cis-1-[70]PBC (brown solid line), and [70]PCBM (black solid line). The excitation wavelengths are 540 nm. The emission intensities were normalized by that of the PCDTBT film considering the difference in the absorbances of the PCDTBT:fullerene films at the excitation wavelength.

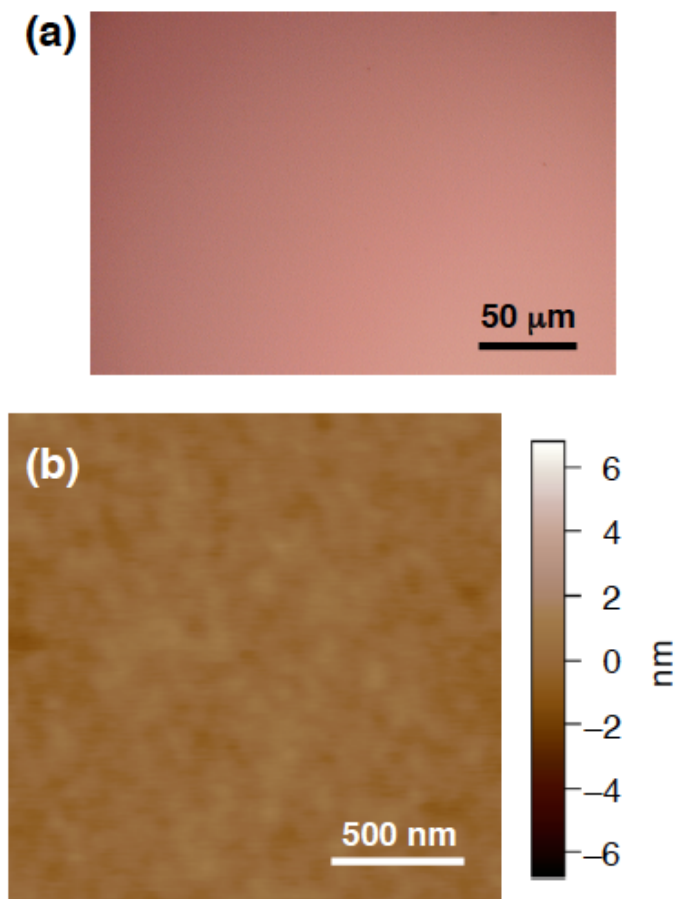

**Fig. S10** (a) Optical microscopy image and (b) tapping-mode atomic force micrograph of PCDTBT:[70]PCBM on ITO/PEDOT:PSS substrates. In (b), the color scale represents the height topography, with bright and dark representing the highest and lowest features, respectively. The rms surface roughness is 0.35 nm.

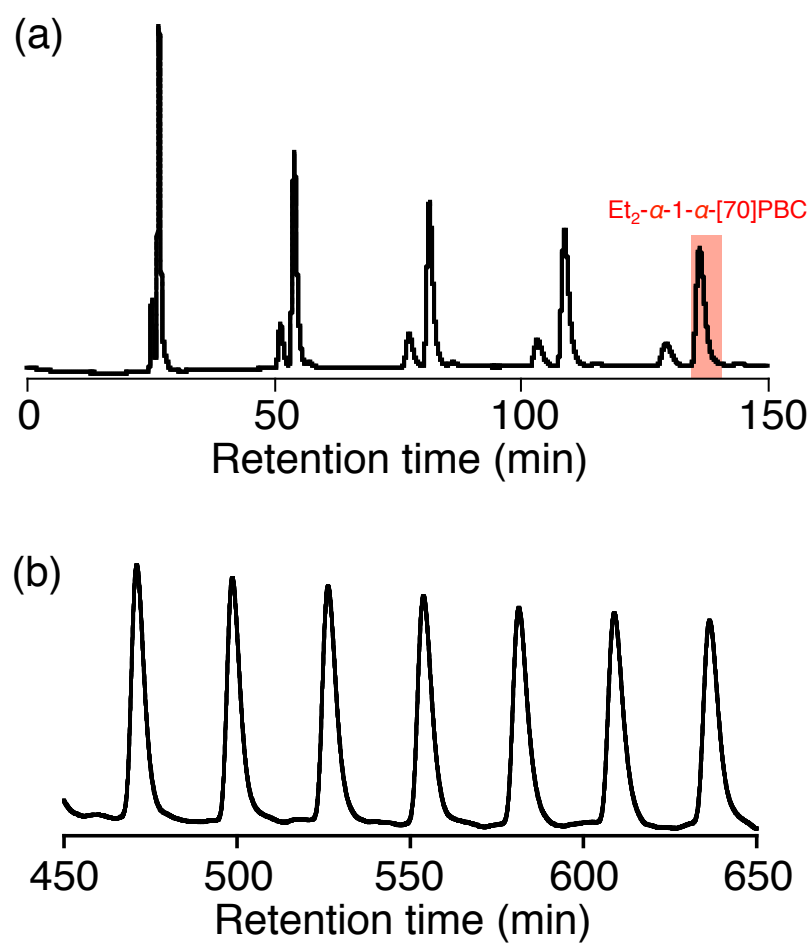

**Fig. S11** (a) HPLC profile with 5PBB column of  $\text{Et}_2\text{-}cis\text{-}1\text{-}[70]\text{PBC}$ . The fraction marked with red color was collected and assigned to  $\text{Et}_2\text{-}\alpha\text{-}1\text{-}\alpha\text{-}[70]\text{PBC}$ . (b) HPLC profile with 5PBB column of  $\text{Et}_2\text{-}\alpha\text{-}1\text{-}\alpha\text{-}[70]\text{PBC}$ .

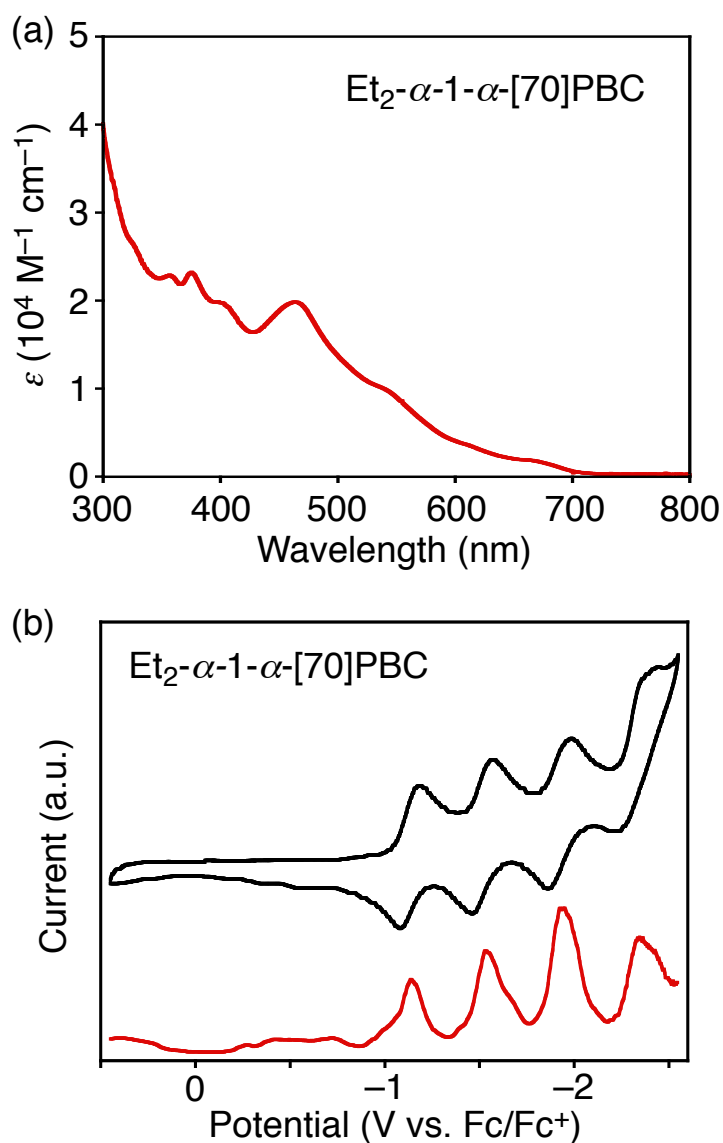

**Fig. S12** (a) UV-vis absorption spectrum of  $\text{Et}_2\text{-}\alpha\text{-1-}\alpha\text{-[70]PBC}$  in ODCB. (b) Cyclic voltammogram (upper) and differential pulse voltammogram (lower) of  $\text{Et}_2\text{-}\alpha\text{-1-}\alpha\text{-[70]PBC}$  versus a reference electrode of  $\text{Fc}/\text{Fc}^+$  measured in ODCB/acetonitrile mixture ( $v/v = 5:1$ ) containing 0.1 M tetrabutylammonium hexafluorophosphate ( $\text{Bu}_4\text{NPF}_6$ ). Sweep rate:  $0.1 \text{ V s}^{-1}$ ; reference electrode,  $\text{Ag}/\text{Ag}^+$  (0.01 M  $\text{AgNO}_3$ , 0.09 M  $\text{Bu}_4\text{NPF}_6$  in acetonitrile).

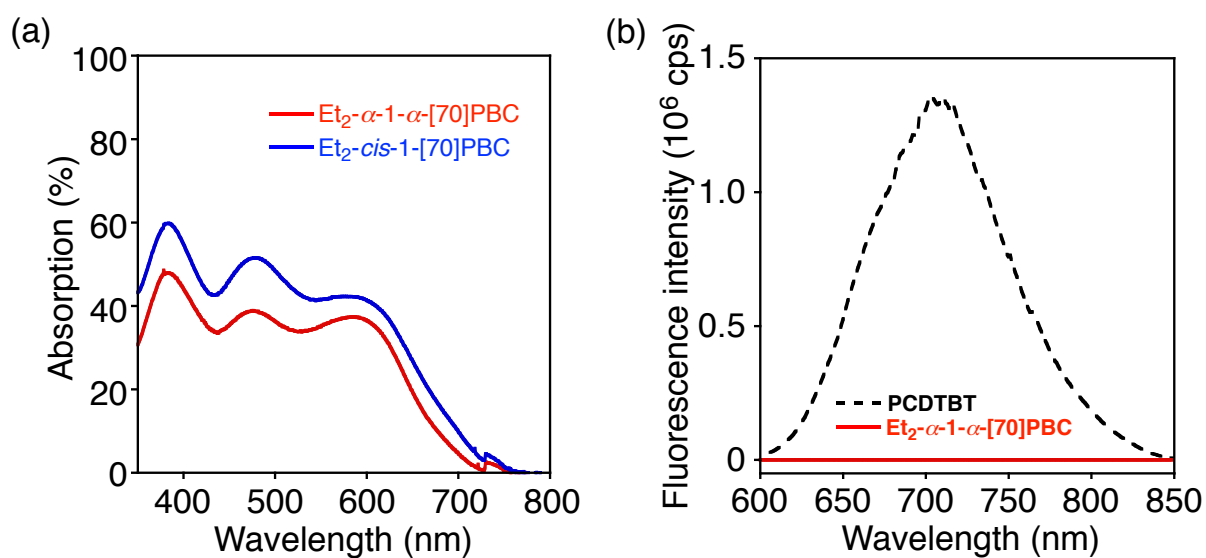

**Fig. S13** (a) UV-visible absorption spectra of blend films of PCDTBT: $\text{Et}_2\text{-}\alpha\text{-1-}\alpha\text{-[70]PBC}$  (red) and PCDTBT: $\text{Et}_2\text{-cis-1-[70]PBC}$  (blue). (b) Photoluminescence spectra of PCDTBT single component film (black dotted) and PCDTBT: $\text{Et}_2\text{-}\alpha\text{-1-}\alpha\text{-[70]PBC}$  (red). The excitation wavelengths are 540 nm. The emission intensities were normalized by that of the PCDTBT film considering the difference in the absorbances of the PCDTBT: $\text{Et}_2\text{-}\alpha\text{-1-}\alpha\text{-[70]PBC}$  film at the excitation wavelength.

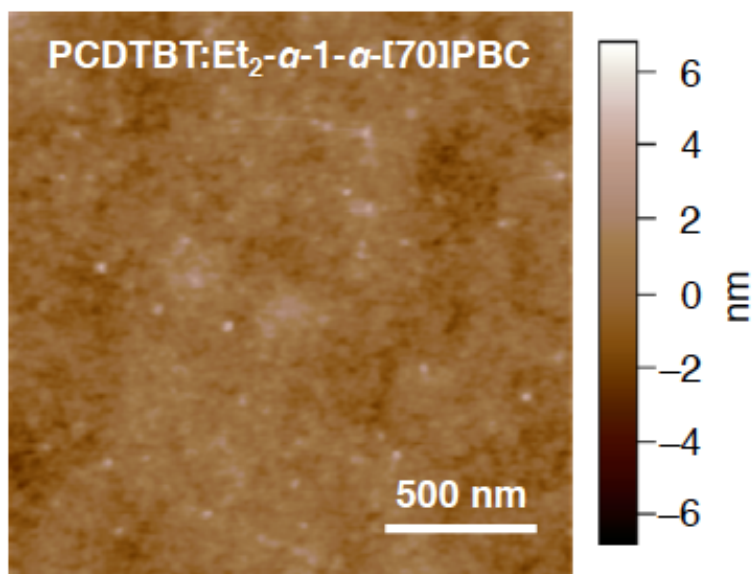

**Fig. S14** Tapping-mode atomic force micrographs of PCDTBT:Et<sub>2</sub>-α-1-α-[70]PBC on ITO/PEDOT:PSS substrates. The color scale represents the height topography, with bright and dark representing the highest and lowest features, respectively. The rms surface roughness is 0.78 nm.
